# Supplementary material for: Novel Thermostable Heparinase Based on the Genome of Bacteroides Isolated from Human Gut Microbiota
Source: MDPI journal article supplement (doi:10.3390/foods11101462), 2022-05-18
Supplement: s1 [file s1]

## Supplementary data

**Table S1.** Analysis of the CAZy database PL13 family and the Centrum bacteriophage library.

| Number | Organism                            | Database   | Speciality |
|--------|-------------------------------------|------------|------------|
| 1      | <i>Bacteroides caecimuris</i>       | CAZy       |            |
| 2      | <i>Bacteroides cellulosilyticus</i> |            |            |
| 3      | <i>Bacteroides helcogenes</i>       |            |            |
| 4      | <i>Bacteroides heparinolyticus</i>  |            |            |
| 5      | <i>Bacteroides intestinalis</i>     |            |            |
| 6      | <i>Bacteroides ovatus</i>           |            |            |
| 7      | <i>Bacteroides sp</i>               |            |            |
| 8      | <i>Bacteroides stercoris</i>        |            |            |
| 9      | <i>Bacteroides thetaiotaomicron</i> |            |            |
| 10     | <i>Bacteroides xylanisolvens</i>    |            |            |
| 11     | <i>Bacteroides uniformis</i>        | Our Center | Y          |
| 12     | <i>Bacteroides fragilis</i>         |            | Y          |
| 13     | <i>Bacteroides thetaiotaomicron</i> |            |            |
| 14     | <i>Bacteroides caccae</i>           |            | Y          |
| 15     | <i>Bacteroides eggerthii</i>        |            | Y          |
| 16     | <i>Bacteroides merdae</i>           |            | Y          |
| 17     | <i>Bacteroides cellulosilyticus</i> |            |            |
| 18     | <i>Bacteroides ovatus</i>           |            |            |
| 19     | <i>Bacteroides clarus</i>           |            | Y          |
| 20     | <i>Parabacteroides distasonis</i>   |            | Y          |
| 21     | <i>Bacteroides vulgus</i>           |            | Y          |
| 22     | <i>Bacteroides stercoris</i>        |            |            |
| 23     | <i>Bacteroides nordii</i>           |            | Y          |
| 24     | <i>Bacteroides fingoldii</i>        |            | Y          |
| 25     | <i>Bacteroides cellulosilyticus</i> |            |            |
| 26     | <i>Bacteroides xylanisolvens</i>    |            |            |
| 27     | <i>Bacteroides sp</i>               |            |            |

Y means only present in Our Center.

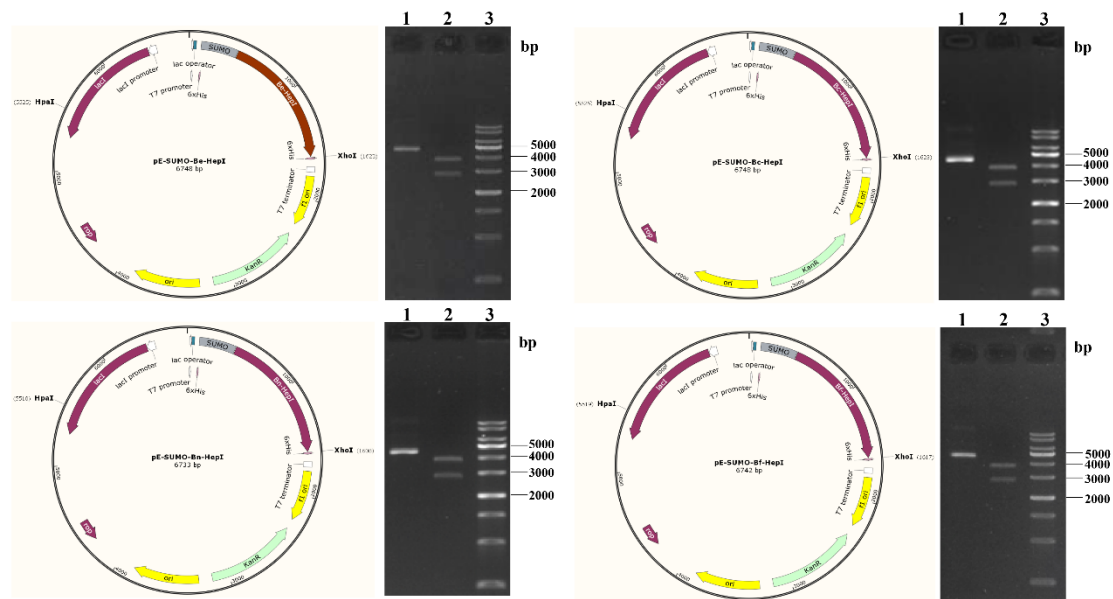

**Figure S1.** The heterologous expression vector was constructed with the fusion tag SUMO-Tag and verified using double digestion with HpaI and XhoI.

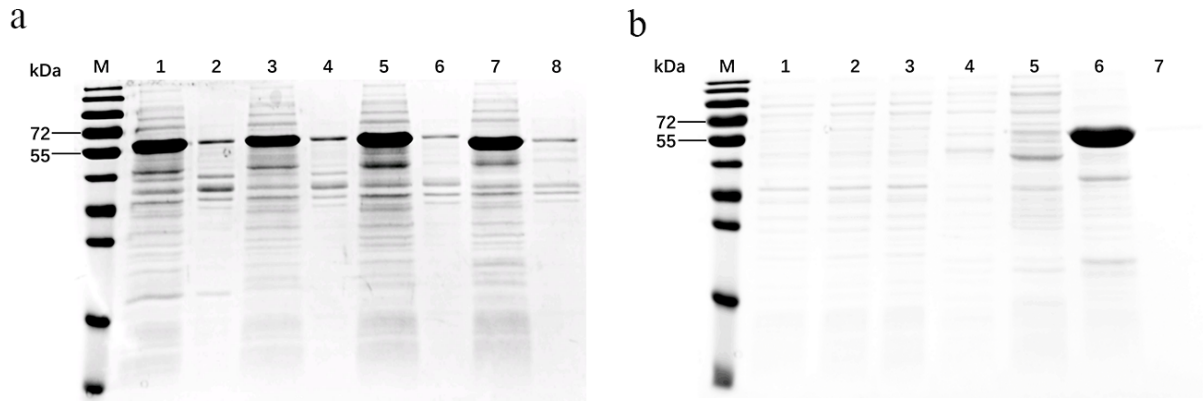

**Figure S2.** Protein expression purification analysis (a) Lane M- protein marker; Lanes 1, 3, 5, and 7- Bc-HepI, Be-HepI, Bf-HepI, and Bn-HepI recombinant strains of bacteriophage lysate supernatants; Lanes 2, 4, 6, and 8- bacterial lysis precipitate of Bc-HepI, Be-HepI, Bf-HepI, and Bn-HepI recombinant strains; (b) Lane M- protein marker; Lanes 1–7- protein eluate imidazole concentrations of 5, 10, 50, 100, 150, 300, 500. The short black line indicates that the molecular weights of the markers are 72 kDa and 55 kDa.

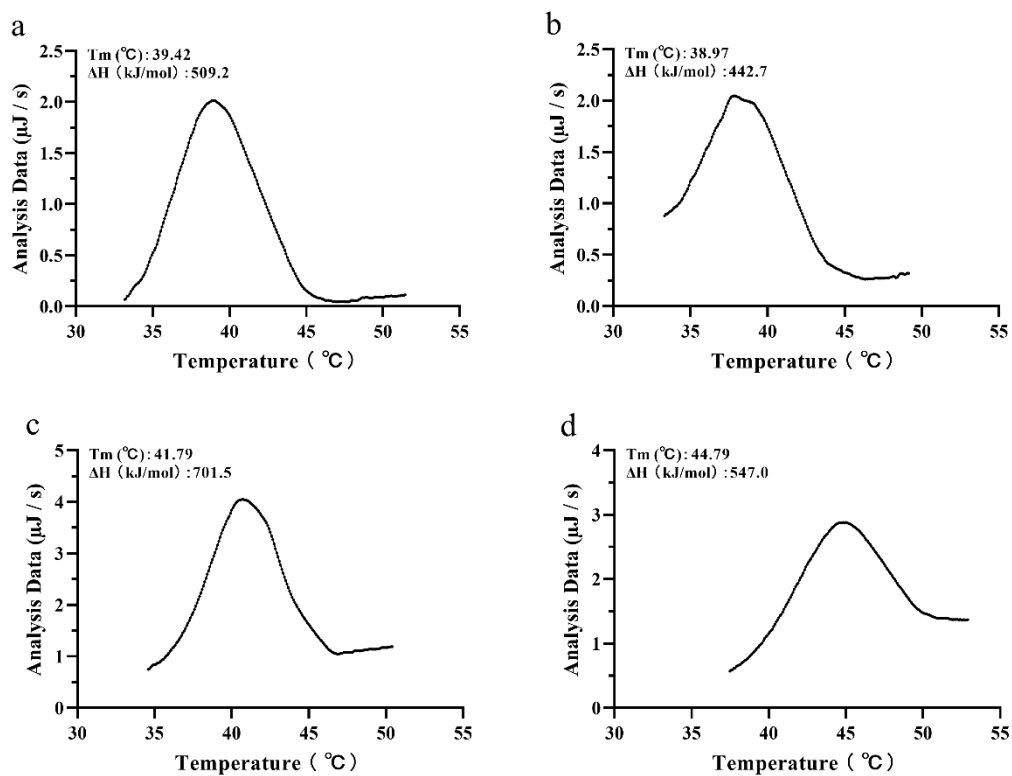

**Figure S3.** Determination of melting temperatures ( $T_m$ ) of Bc-HepI (a), Be-HepI (b), Bf-HepI (c), and Bn-HepI (d) using differential scanning calorimetry.

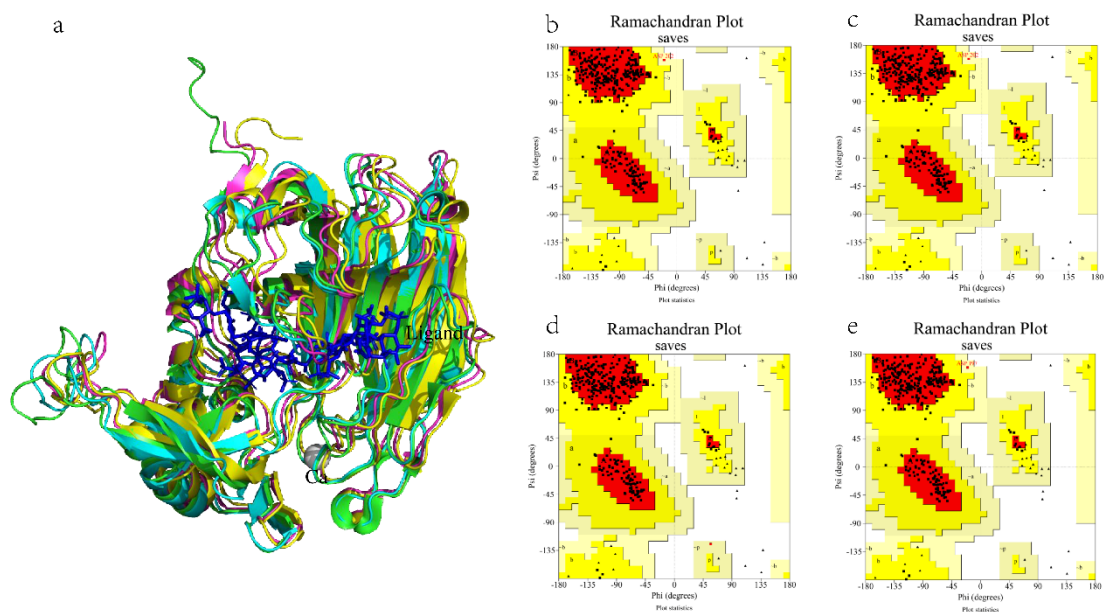

**Figure S4.** Protein three-dimensional (3D) structure simulation, overlap, and evaluation. (a) The 3D structures of Bc-HepI, Be-HepI, Bf-HepI, and Bn-HepI are shown overlapping. The blue rod-like structure is the substrate ligand. (b-e) Evaluation of the 3D simulated structures of Bc-HepI, Be-HepI, Bf-HepI, and Bn-HepI.
